# Supplementary material for: Development and Validation of Method for Determining Quercetin 3-Glucuronide and Ellagic Acid Content of Common Evening Primrose (<em>Oenothera biennis</em>) by HPLC-UVD
Source: Preprints.org preprint supplement (doi:10.20944/preprints202012.0268.v1), 2020-12-10
Supplement: Supplementary file 1 [file supplementary]

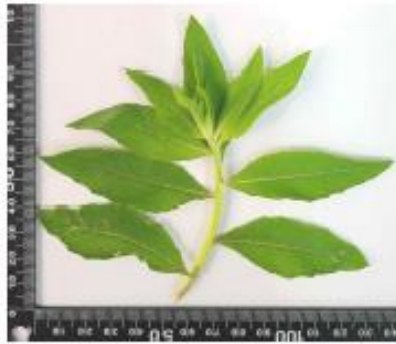

(a)

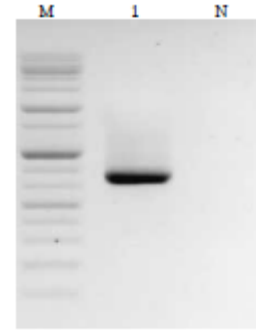

(b)

**Supplementary Figure S1. (a) Test article and (b) PCR amplification of test article by ITS DNA analysis. M: 1Kb(+), 1: test article, N:negative control.**

**Supplementary Table S2. Genetic identification of test article by ITS DNA analysis**

| Sample          | Gene bank No. (NCBI) | Identification           | Similarity     |
|-----------------|----------------------|--------------------------|----------------|
| Evenig primrose | MT610948.1           | <i>Oenothera biennis</i> | 704/704 (100%) |
